# Supplementary material for: Web-based decision aids to support breast cancer screening decisions: systematic review and meta-analysis
Source: Atypon-hosted journal article supplement (doi:10.2217/cer-2020-0052), 2020-10-01
Supplement: suppl_file.docx [file suppl_file.docx]

search strategy

1. Decision Making[Mesh]
2. Choice Behavior[Mesh]
3. 1or2
4. Decision Support Techniques[Mesh])
5. Decision Trees[Mesh]
6. Audiovisual Aids"[Mesh]
7. risk communication tool* [tw]
8. risk assessment tool* [tw]
9. risk information[tw]
10. informed choice*[tw]
11. informed decision*[tw]
12. patient decision*[tw]
13. "Decision Support Systems, Clinical"[Mesh]
14. decision* aid* [tw]
15. decision* support*[tw]
16. decision* tool*[tw] OR
17. shared decision making[tw]
18. 3or 4or 5or 6or 7or 8or 9or 10or 11or 12or 13or 14or 15or 16or 17
19. interactive[tw]
20. computer*[tw]
21. web based[tw]
22. Internet[Mesh]
23. User-Computer Interface[Mesh]
24. Decision Making, Computer-Assisted[Mesh]
25. medical informatics [Mesh]
26. 19or 20or 21or 22or 23or 24or 25
27. 18and 26
28. Breast Neoplasms[Mesh]
29. breast cancer[tw]
30. 28or 29
31. Mammography[Mesh]
32. Early Detection of Cancer[Mesh]
33. screening[tw]
34. 310r 32 or 33
35. 27and 30and 34
